# Supplementary material
Source: publisher figshare collection journal article supplement (https://geolsoc.figshare.com/ndownloader/files/31096428)
Supplement: Supplementary file 1 [file 31096428]

## Sheet: Parameters and results summary
	Model 1 (>25 Ma)	Model 1 (>18 Ma)	Model 2 (>25 Ma)	Model 2 (> 18 Ma)	Model 3 (>25 Ma)	Model 3 (>18 Ma)
Model results
Modeled Subsidence at Corque (km)	2.5	5.6	4.7	7.35	4.1	7.35
Modeled height Western Cordillera load (km)	2.25	6	3	6	2.25	4.2
Modeled height Eastern Cordillera load (km)	1.75	3.7	3.6	5.3	1.75	2.9
Residual subsidence (km)	2.2	1.75	0	0	0.6	0
Model inputs
Distance to Western Cordillera (km)	75	75	75	75	25	25
Max Western Cordilllera load height (km)	2.25	6	5	6	2.25	6
Distance to Eastern Cordillera (km)	25	25	25	25	25	25
Max Eastern Cordillera load height (km)	1.75	3.7	5	6	1.75	3.7
Observed sediment thickness (km)	4.7	7.35	4.7	7.35	4.7	7.35
Location of Chuquichambi (m from zero, Flexural profiles tab)	215000	215000	215000	215000	165000	165000
Common for all model runs:
Poisson's ratio	0.25
Young's modulus	70000000000
Gravity (m/s2)	9.81
Mantle density (kg m-3)	3300
Load density (kg m-3)	2600
Infill density (kg m-3)	2400
Effective Elastic thickness (km)	20

## Sheet: Flexural profiles
Horizontal distance (m)	Deflection Model 1 (m)			Deflection Model 2 (m)			Deflection Model 3 (m)
	Constrained >25 Ma	Constrained >18 Ma		Unconstrained >25 Ma	Unconstrained >18 Ma		Short >25 Ma	Short >18 Ma
0	-3361.68	-9008.88		-4421.78	-8935.31		-3291.15	-6208.36
15000	-3979.8	-10669.6		-5229.32	-10575.6		-3920.92	-7412.62
30000	-4495.84	-12058.1		-5900.74	-11943.6		-4461.9	-8443.35
45000	-4867.55	-13060.4		-6381.6	-12927.6		-4876.14	-9225.63
60000	-5072.08	-13613.5		-6644.14	-13467.9		-5145.4	-9722.75
75000	-5101.25	-13692.8		-6681.08	-13544.7		-5265.98	-9925.96
90000	-4959.26	-13305.9		-6502.64	-13171.5		-5245.84	-9848.82
105000	-4662.88	-12493.2		-6136.85	-12395.7		-5104.02	-9526.22
120000	-4244.13	-11335.1		-5632.98	-11306.2		-4872.17	-9017.89
135000	-3751.48	-9955.34		-5062.89	-10035.9		-4594.41	-8408.55
150000	-3253.06	-8529.82		-4524.76	-8770.16		-4328.78	-7811.59
165000	-2828.46	-7265.66		-4131.45	-7724.66		-4137.22	-7350
180000	-2531.79	-6303.35		-3960.08	-7046.27		-4046.56	-7080.06
195000	-2391.59	-5717.66		-4050.35	-6811.93		-4046.28	-6988.04
210000	-2413.42	-5526.25		-4406	-7034.6		-4092.42	-6998.08
225000	-2581.11	-5694.8		-4994	-7665.4		-4139.72	-7030.17
240000	-2856.62	-6138.85		-5741.42	-8591.68		-4151	-7017.45
255000	-3178.94	-6723.19		-6531	-9632.62		-4097.18	-6906.6
270000	-3483.76	-7304.65		-7239.94	-10598		-3958.33	-6660.11
285000	-3723.08	-7774.51		-7779.07	-11347.2		-3723.08	-6255.36
300000	-3864.04	-8056.58		-8089.68	-11784.9		-3389.47	-5686.36
315000	-3885.72	-8100.71		-8136.48	-11851.8		-2967.49	-4968.2
330000	-3777.51	-7879.57		-7904.08	-11518.8		-2483.14	-4144.51
345000	-3539.32	-7389.07		-7397.35	-10788.3		-1980.7	-3291.45
360000	-3183.64	-6652.72		-6645.84	-9700.01		-1504.63	-2485.7
375000	-2736.59	-5723.65		-5705.95	-8334.52		-1081.9	-1773.32
390000	-2240.67	-4690.3		-4666.84	-6821.53		-725.908	-1176.63
405000	-1749	-3664.16		-3638.76	-5322.57		-440.232	-700.952
420000	-1297.54	-2720.91		-2696.18	-3946.96		-221.83	-340.259
435000	-906.53	-1903.18		-1880.77	-2756.01		-63.6054	-81.6944
450000	-584.426	-1229		-1209.8	-1775.34		43.6217	90.9894
465000	-331.462	-699.102		-683.438	-1005.48		109.678	194.949
480000	-142.517	-302.941		-290.763	-430.7		144.059	246.587
495000	-9.39811	-23.5157		-14.5218	-25.9678		155.324	260.54
510000	77.4526	159.078		165.325	237.888		150.774	249.164
525000	127.745	265.1		269.092	390.478		136.338	222.387
